# Supplementary material
Source: publisher figshare collection journal article supplement (https://acs.figshare.com/ndownloader/files/4544023)
Supplement: Supplementary file 1 [file 4544023]

## Supporting Information

### **Resonance Energy Transfer Approach and A New Ratiometric Probe for Hg<sup>2+</sup> in Aqueous Media and Living Organism**

Moorthy Suresh, Sandhya Mishra, Sanjeev Kumar Mishra, E. Suresh, Amal K. Mandal, Anupama Shrivastav and Amitava Das\*

#### **Contents**

|                                                                                                 |       |
|-------------------------------------------------------------------------------------------------|-------|
| 1. Material and methods                                                                         | S1-S2 |
| 2. <sup>1</sup> H NMR spectrum of <b>L</b> <sub>1</sub>                                         | S3    |
| 3. <sup>13</sup> C NMR spectrum of <b>L</b> <sub>1</sub>                                        | S4    |
| 4. Mass spectrum of <b>L</b> <sub>1</sub>                                                       | S5    |
| 5. <sup>1</sup> H NMR spectrum of <b>L</b> <sub>2</sub>                                         | S6    |
| 6. <sup>13</sup> C NMR spectrum of <b>L</b> <sub>2</sub>                                        | S7    |
| 7. Crystal structure of <b>L</b> <sub>1</sub>                                                   | S8    |
| 8. Mass spectrum of <b>L</b> <sub>2</sub>                                                       | S9    |
| 9. Absorption spectra of <b>L</b> <sub>1</sub> with various metal ions                          | S10   |
| 10. Absorbance based competitive metal ion study of <b>L</b> <sub>1</sub> with Hg <sup>2+</sup> | S11   |
| 11. Fluorescence spectra of <b>L</b> <sub>1</sub> with different metal ions                     | S12   |
| 12. UV-vis titration of <b>L</b> <sub>1</sub> with Cu <sup>2+</sup>                             | S13   |
| 13. Fluorescence titration of <b>L</b> <sub>1</sub> with Cu <sup>2+</sup>                       | S14   |
| 14. Absorption spectra of <b>L</b> <sub>2</sub> with various metal ions                         | S15   |
| 15. Fluorescence spectra of <b>L</b> <sub>2</sub> with different metal ions                     | S16   |
| 16. Job's plot                                                                                  | S17   |
| 17. Reversibility study                                                                         | S18   |
| 18 Absorption spectra of <b>L</b> <sub>1</sub> and <b>L</b> <sub>2</sub>                        | S19   |
| 19. Visual color change                                                                         | S20   |
| 20. Bacterial cell growth                                                                       | S21   |
| 21. FRET calculation.                                                                           | S22   |
| 22. Equations                                                                                   | S23   |

## **1. Material and methods:**

### **Reagents used:**

Rhodamine 6G, 2-thiophenaldehyde, Hydrazine hydrate, Dansyl chloride were purchased from Sigma-Aldrich (USA). Methanol, Ethanol, Chloroform (AR Grade) and HPLC water were obtained from S.D. Fine Company (India).

### **Absorption emission and fluorescence decay experiments.**

Absorption Spectra were recorded with Varian Cary 500 Scan Uv-vis-NIR Spectrophotometer. While room temperature luminescence spectra and fluorescence decay data were recorded with HORIBA JOBIN YVON spectrophotometer. AXIO IMAGER, Carl Ziess, instrument was used for recording microscopic imaging experiments. OLYMPUS 1 X 81 with FV1000 confocal laser microscope was used for recoding confocal images.

### **Synthesis of Rhodamine 6G hydrazone (I), compound L<sub>1</sub> and L<sub>2</sub>:**

Rhodamine 6G hydrazone (I) was prepared following a literature method.<sup>1</sup>

### **Procedure for the synthesis of L<sub>1</sub>:**

Rhodamine 6G hydrozide (I; 0.85 mmol, 0.365 g) and thiophene-2-carbaldehyde (1.0 mmol, 0.110 g) were stirred in boiling methanol with 3 drops of acetic acid. After 2 h of

stirring, white precipitates was obtained. This was filtered off, washed with methanol/ether (1:1) mixture and dried over P<sub>2</sub>O<sub>5</sub>. Yield: 75% (. <sup>1</sup>H-NMR (500 MHz, d<sub>6</sub>-DMSO), (ppm): 8.762 (1H, s), 7.886-7.871 (1H, d, *J* = 7.5), 7.597-7.528 (3H, m), 7.178-7.172 (1H, d, *J* = 3), 7.004-6.987 (2H, t, *J* = 4.5), 6.309 (2H, s), 6.155 (2H, s), 5.069-5.049 (2H, s), 3.134-3.095 (4H, q, *J* = 6.5), 1.834 (6H, s), 1.209-1.181 (6H, t, *J* = 7). <sup>13</sup>C NMR (500 MHz, d<sub>6</sub>-DMSO), (ppm): 164.0, 151.9, 148.2, 142.2, 140.2, 134.3, 131.2, 129.4, 129.1, 128.8, 128.2, 127.2, 124.1, 123.4, 118.7, 105.2, 96.2, 65.9, 37.9, 17.4, 14.6. ESI-MS: *m/z* = 523.31 for [L<sub>1</sub>+H]<sup>+</sup>, cal. for C<sub>31</sub>H<sub>30</sub>N<sub>4</sub>O<sub>2</sub>S<sub>1</sub>, L<sub>1</sub>, 522.66

### Synthesis of L<sub>2</sub>:

0.3 g (0.57 mmol) of L<sub>1</sub> and 80 µl of dry triethyl amine was dissolved in 50 ml dry chloroform under N<sub>2</sub> atmosphere. To this solution 0.158 g (0.58 mmol) of dansyl chloride was added and refluxed for 24 hours. The organic layer was washed 3 times with 50 ml of water and dried over anhydrous Na<sub>2</sub>SO<sub>4</sub>. Finally the crude was purified by column chromatography using CHCl<sub>3</sub>/MeOH (99:1) as an eluent to give 0.135 g of orange color solid of L<sub>2</sub> of 30% yield. <sup>1</sup>H-NMR (500 MHz, CDCl<sub>3</sub>), (ppm): 8.644 (1H, s), 8.009-7.992 (1H, d, *J* = 8.5), 7.479-7.465 (4H, m), 7.227-7.218 (2H, d, *J* = 4.5), 7.068-7.051 (2H, d, *J* = 8.5), 7.018-7.011 (2H, d, *J* = 3.5), 6.887-6.879 (2H, t, *J* = 4.5), 6.400 (2H, s), 6.329 (2H, s), 3.480 (2H, s), 3.201 (6H, s), 1.873 (6H, s), 1.667 (2H, s), 1.327-1.298 (6H, t, *J* = 7.5). <sup>13</sup>C NMR (500 MHz, CDCl<sub>3</sub>), (ppm): 164.8, 151.9, 151.4, 147.5, 141.2, 141.0, 133.3, 129.5, 129.3, 128.9, 128.2, 127.8, 127.7, 126.9, 123.7, 123.3, 122.8, 118.3, 117.9, 116.0, 106.2, 96.7, 66.0, 45.4, 38.3, 29.7, 16.7, 14.7. ESI-MS: *m/z* = 794.32 for [L<sub>2</sub>+K]<sup>+</sup>, cal. for C<sub>43</sub>H<sub>41</sub>N<sub>5</sub>O<sub>4</sub>S<sub>2</sub>, L<sub>2</sub>, 755.95.

(1). Wu, D.; Huang, W.; Duan, C.; Lin, Z.; Meng, Q. *Inorg. Chem.* **2007**, *46*, 1538-1540.

## 2. $^1\text{H}$ NMR Spectrum of $\text{L}_1$ :

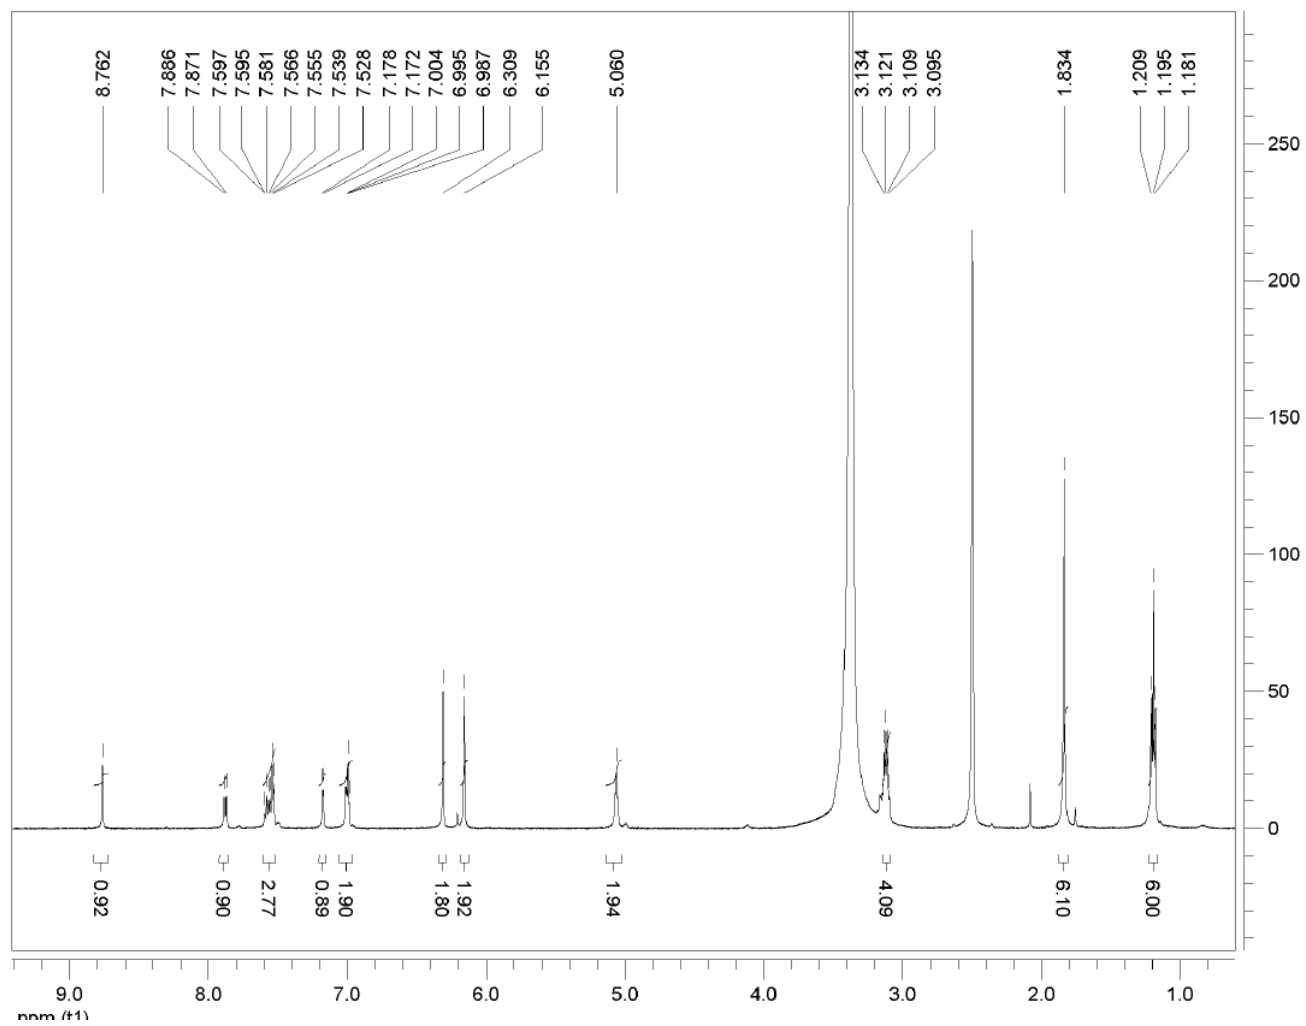

**SI Figure 1:**  $^1\text{H}$  NMR spectra recorded for  $\text{L}_1$  in  $\text{d}_6$  DMSO.

### 3. $^{13}\text{C}$ NMR Spectrum of $\text{L}_1$ :

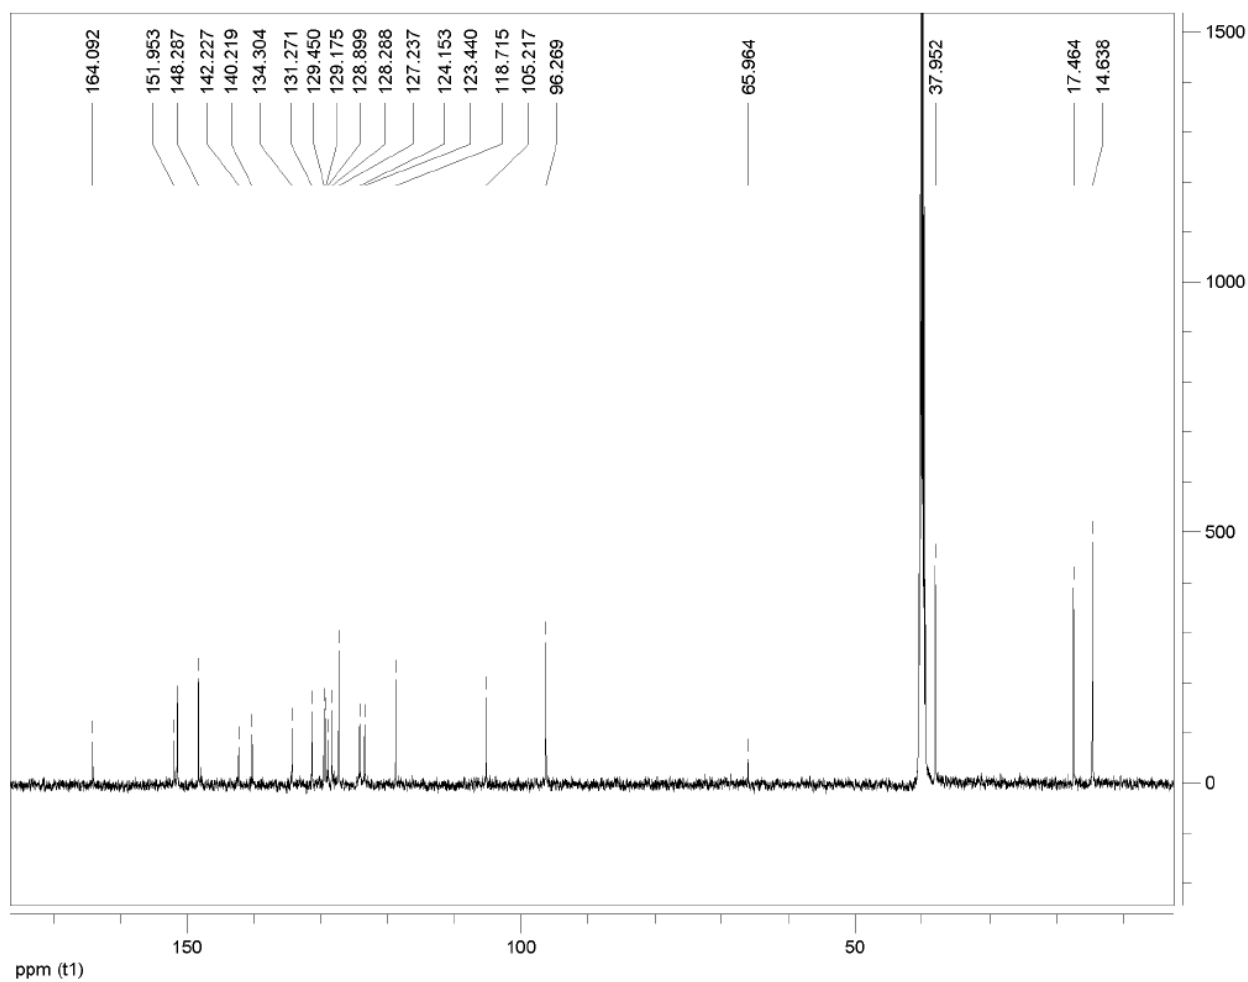

**SI Figure 2:**  $^{13}\text{C}$  NMR spectra recorded for  $\text{L}_1$  in  $\text{d}_6$  DMSO

#### 4. Mass Spectrum of $L_1$ :

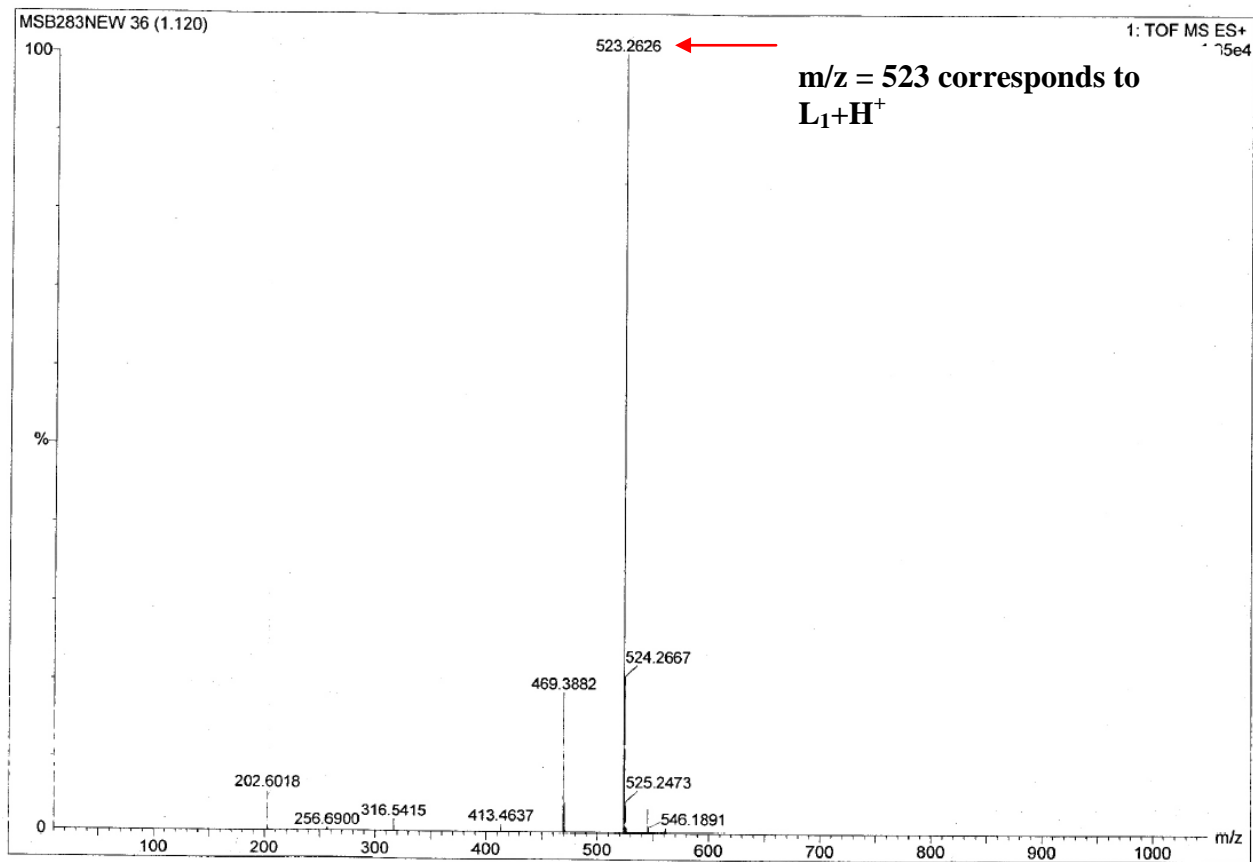

SI Figure 3: ESI-MS spectra for  $L_1$ .

## 5. NMR spectrum of $L_2$

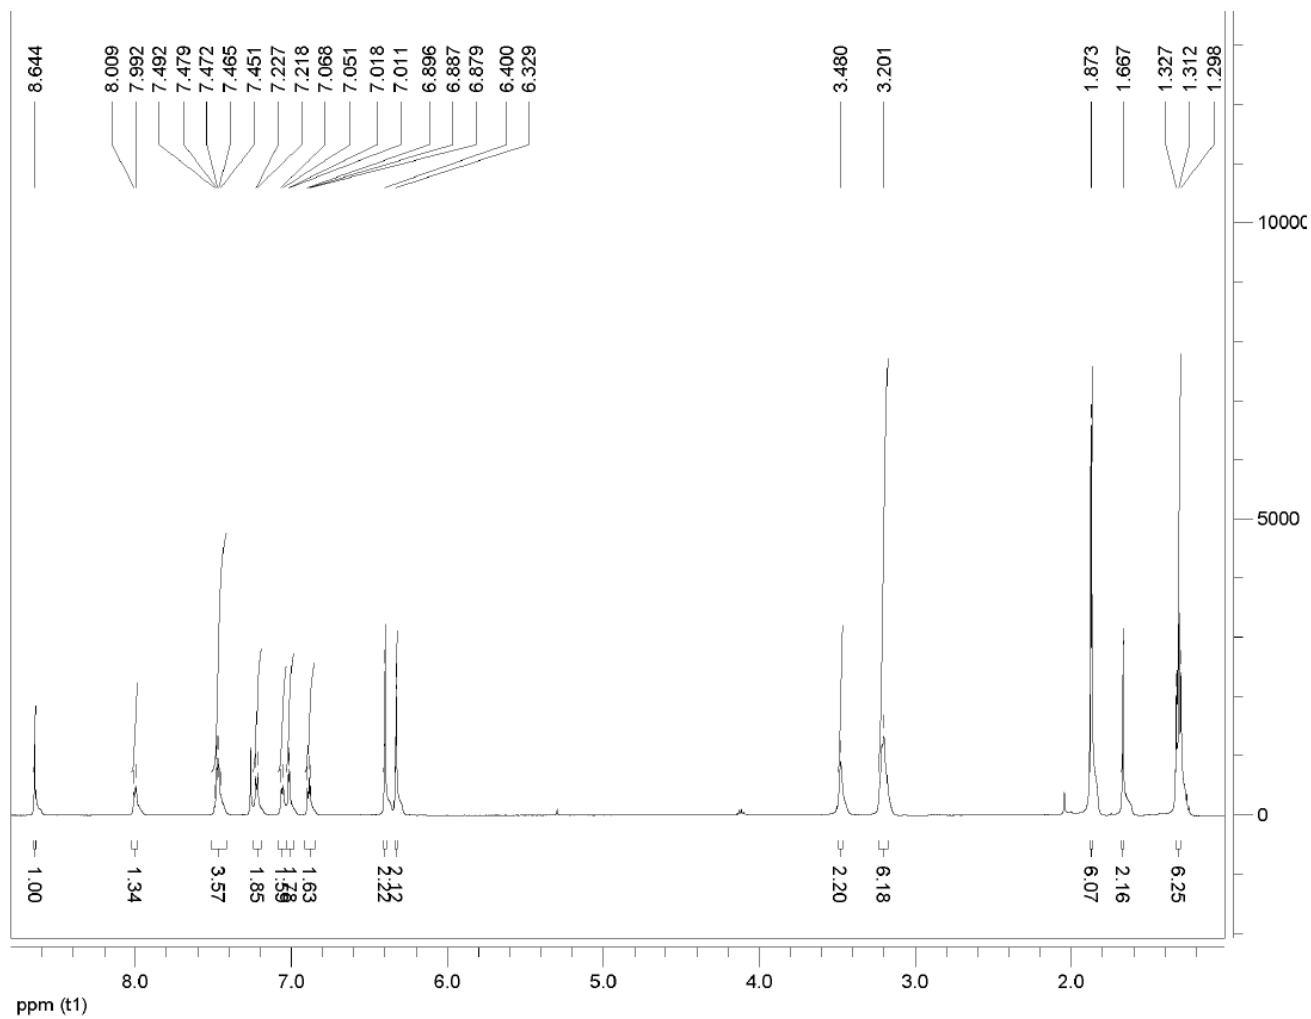

SI Figure 4:  $^1\text{H}$  NMR spectra recorded for  $L_2$  in  $\text{CDCl}_3$ .

## 6. $^{13}\text{C}$ NMR spectrum of $\text{L}_2$

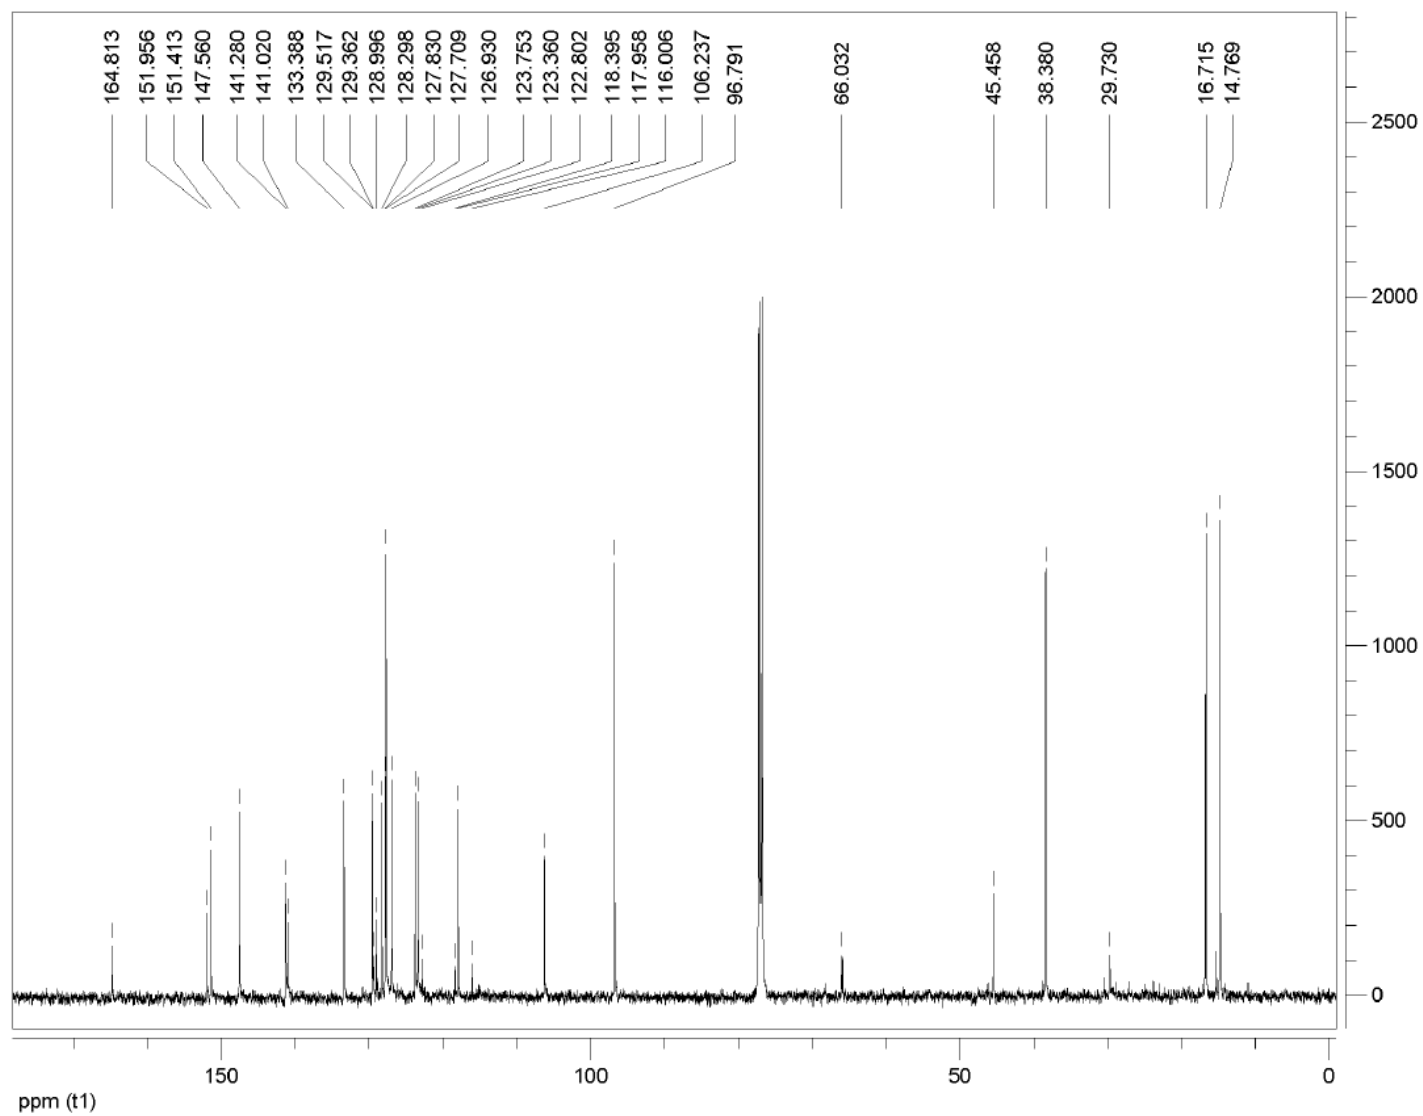

SI Figure 5:  $^{13}\text{C}$  NMR spectra recorded for  $\text{L}_2$  in  $\text{CDCl}_3$ .



## 7. Crystal structure of L<sub>1</sub>:

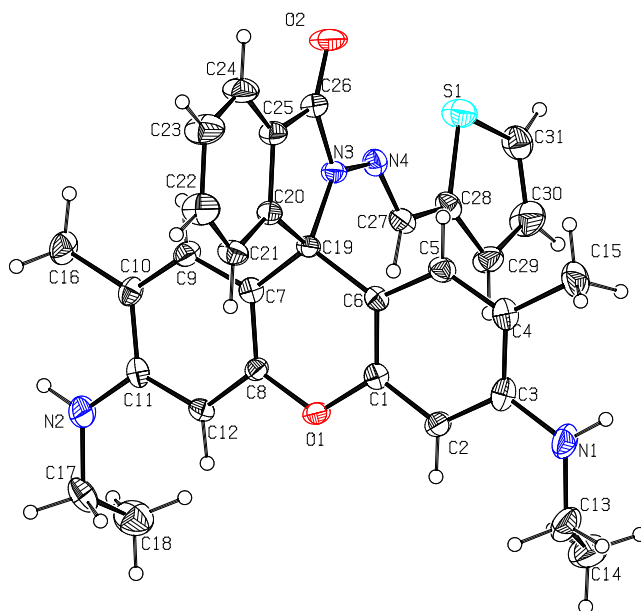

**SI Figure 6:** ORTEP diagram of the compound L<sub>1</sub> (30% probability factor for the thermal ellipsoids)

## 8. Mass spectrum of $L_2$ :

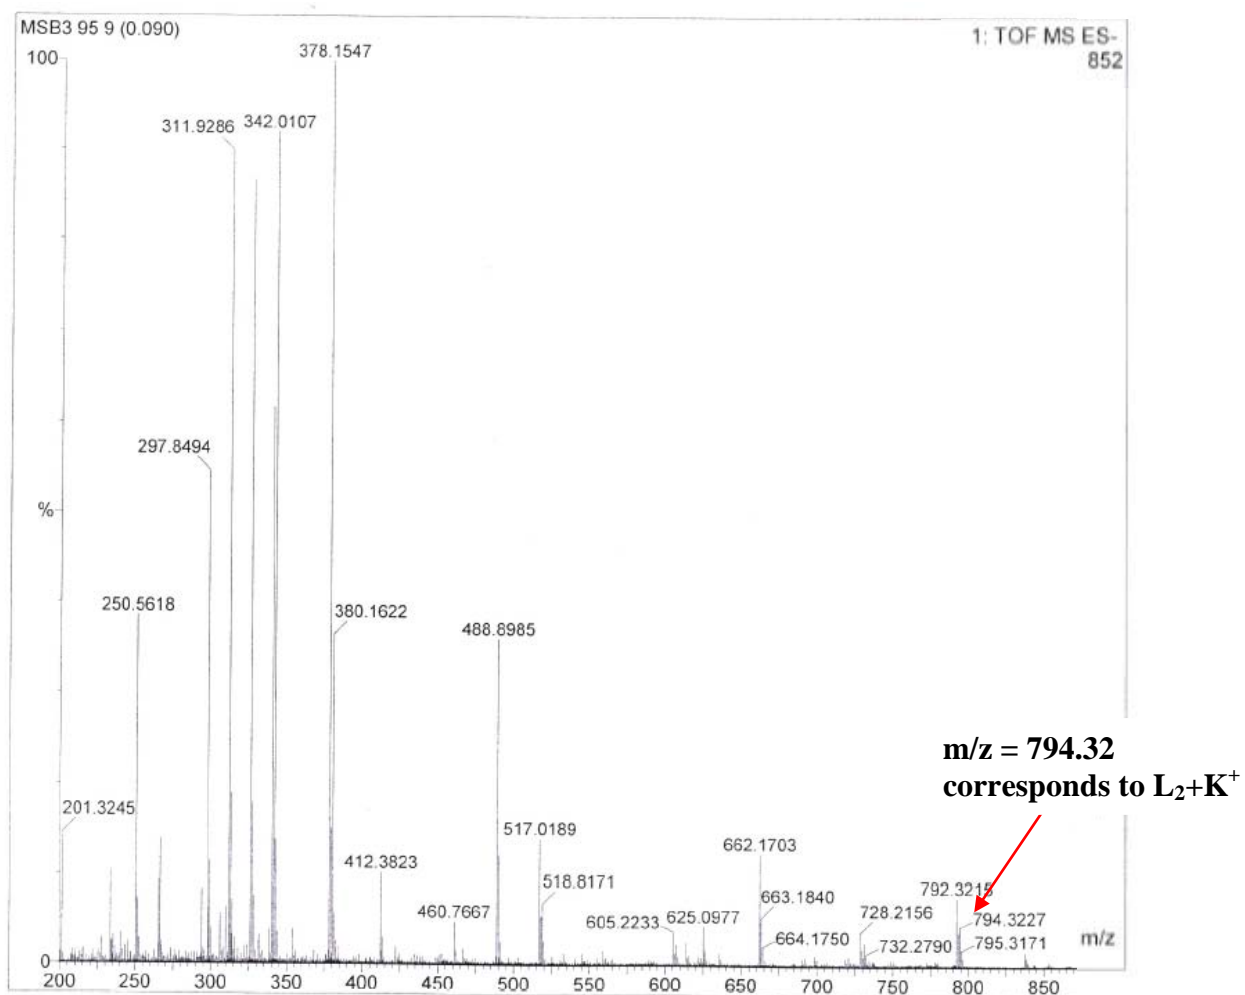

SI Figure 7: ESI-MS spectra for  $L_2$ .

## **9. Changes in the Absorption spectra with various other metal ions:**

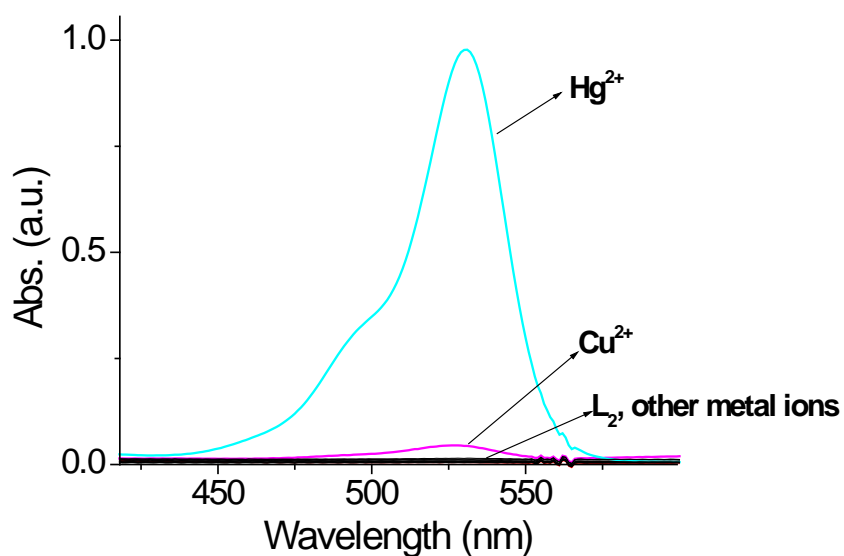

**SI Figure 8:** Changes in the absorption spectra of  $L_1$  ( $5.0 \times 10^{-5}$  M) in the presence of various other metal ions ( $Co^{2+}$ ,  $Ni^{2+}$ ,  $Cu^{2+}$ ,  $Ca^{2+}$ ,  $Cd^{2+}$ ,  $Co^{2+}$ ,  $Mg^{2+}$ ,  $Zn^{2+}$ ,  $Hg^{2+}$ ,  $Na^+$ ,  $K^+$ ,  $Fe^{2+}$ ) ( $5.0 \times 10^{-4}$  M) in water/acetonitrile (1:1, v/v) mixture.

## 10. Absorption based competitive metal ions study with $\text{Hg}^{2+}$

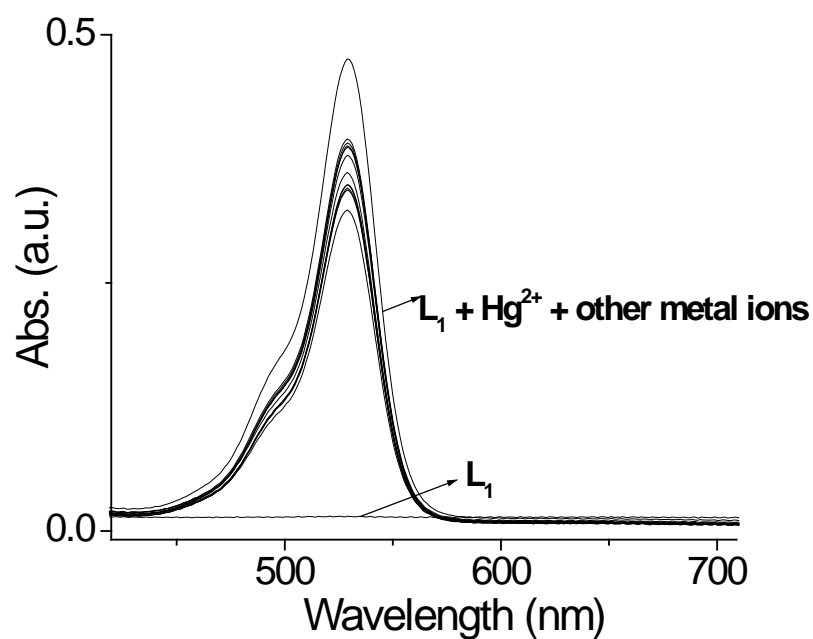

**SI Figure 9** : Change in the absorption spectra of  $\text{L}_1$  ( $6.0 \times 10^{-5}\text{M}$ ) in the presence of  $\text{Hg}^{2+}$  ( $2.0 \times 10^{-4}\text{M}$ ) with various other metal ions ( $\text{Co}^{2+}$ ,  $\text{Ni}^{2+}$ ,  $\text{Cu}^{2+}$ ,  $\text{Ca}^{2+}$ ,  $\text{Cd}^{2+}$ ,  $\text{Co}^{2+}$ ,  $\text{Mg}^{2+}$ ,  $\text{Zn}^{2+}$ ,  $\text{Na}^+$ ,  $\text{K}^+$ ,  $\text{Fe}^{2+}$ ) ( $2.0 \times 10^{-4}\text{M}$ ) in water/acetonitrile (1:1, v/v) mixture.

## 11. Fluorescence scanning with different metal ions:

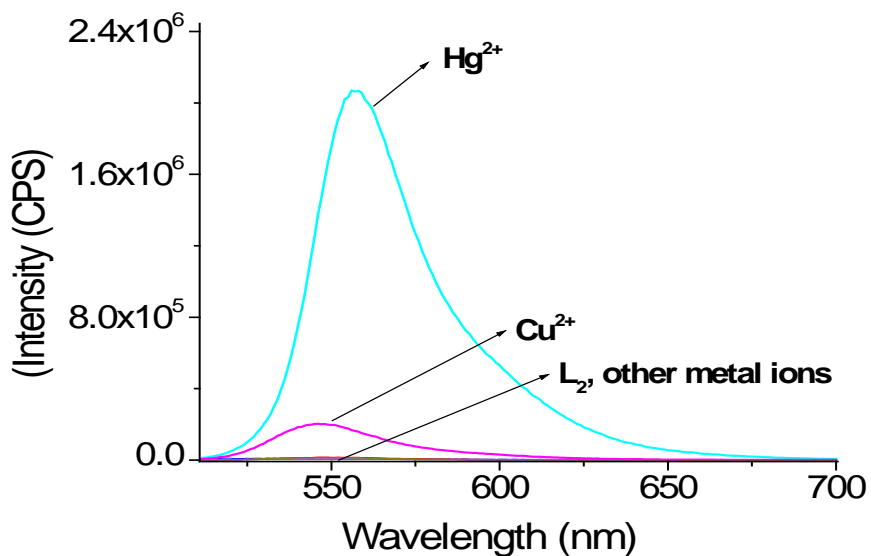

**SI Figure 10:** Change in the emission spectra of  $L_1$  (5.0 x 10<sup>-5</sup> M) in the presence of various metal ions ( $Hg^{2+}$ ,  $Co^{2+}$ ,  $Ni^{2+}$ ,  $Cu^{2+}$ ,  $Ca^{2+}$ ,  $Cd^{2+}$ ,  $Co^{2+}$ ,  $Mg^{2+}$ ,  $Zn^{2+}$ ,  $Na^+$ ,  $K^+$ ,  $Fe^{2+}$ ) (5.0 x 10<sup>-4</sup> M) in water/acetonitrile (1:1, v/v) mixture.  $\lambda_{ext}$ : 500 nm.

## 12. UV Titration with Copper perchlorate:

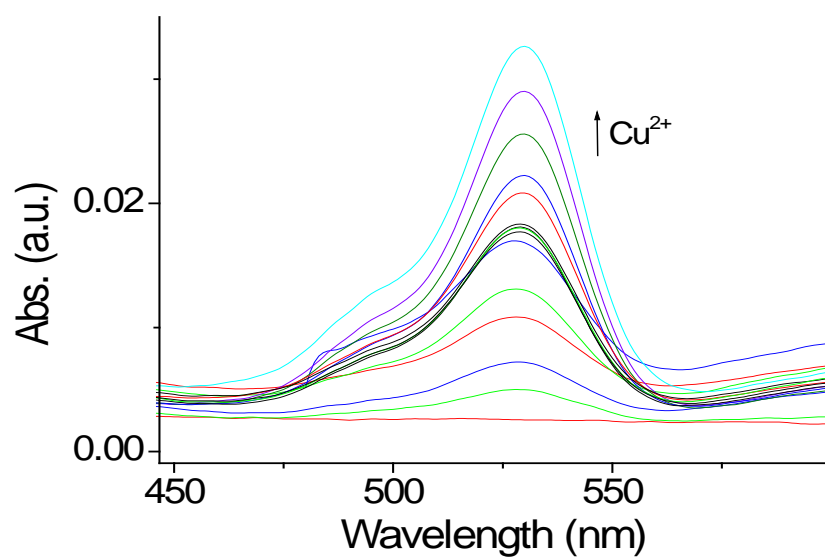

**SI Figure 11:** Change in the absorption spectra of  $L_1$  ( $2.0 \times 10^{-5} M$ ) upon addition of varying  $[Cu^{2+}]$  of ( $0 - 8.0 \times 10^{-4} M$ )  $Cu^{2+}$  in water/acetonitrile (1:1, v/v) mixture.

### **13. Fluorescence titration with copper perchlorate:**

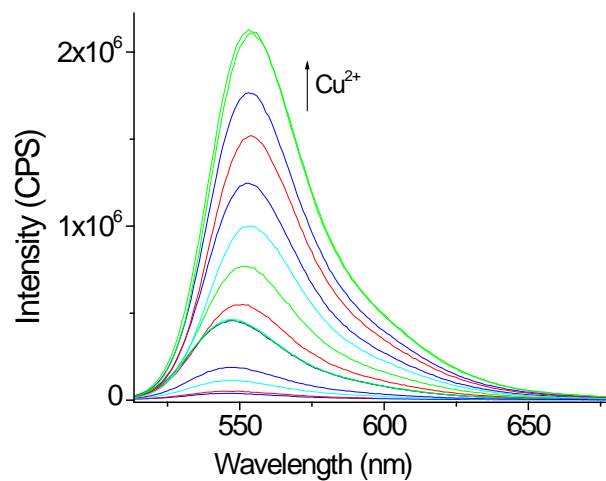

**SI Figure 12:** Change in the fluorescence spectra of **L**<sub>1</sub> ( $2.0 \times 10^{-5}$ M) upon addition of varying  $[\text{Cu}^{2+}]$  (0 -  $8.0 \times 10^{-4}$ M)  $\text{Cu}^{2+}$  in water/acetonitrile (1:1, v/v) mixture [ $\lambda_{\text{ext}} = 500$  nm].

**14. Changes in the Absorption spectra of L<sub>2</sub> with various other metal ions:**

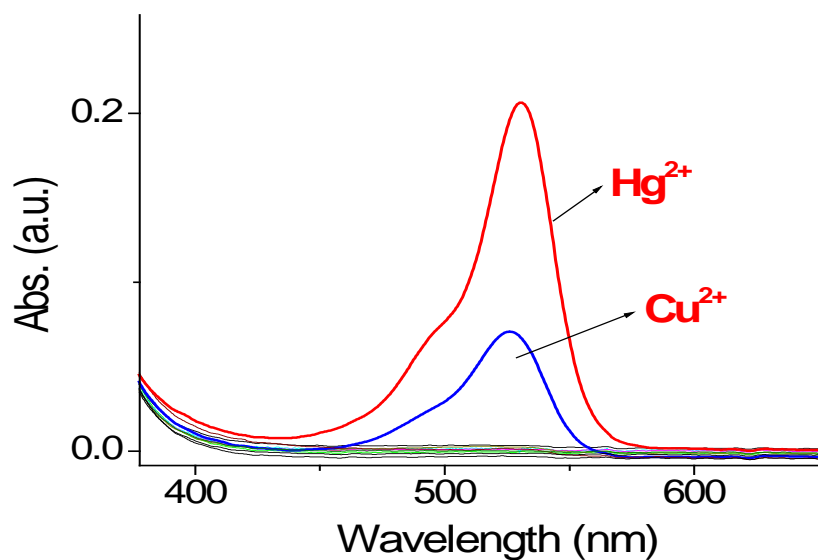

**SI Figure 13:** Changes in the absorption spectra of L<sub>2</sub> (5.0 x 10<sup>-5</sup> M) in the presence of various other metal ions (Co<sup>2+</sup>, Ni<sup>2+</sup>, Cu<sup>2+</sup>, Ca<sup>2+</sup>, Cd<sup>2+</sup>, Co<sup>2+</sup>, Mg<sup>2+</sup>, Zn<sup>2+</sup>, Hg<sup>2+</sup>, Na<sup>+</sup>, K<sup>+</sup>, Fe<sup>2+</sup>) (5.0 x 10<sup>-4</sup> M) in water/acetonitrile (1:1, v/v) mixture.



## **15. Fluorescence scanning study for L<sub>2</sub>:**

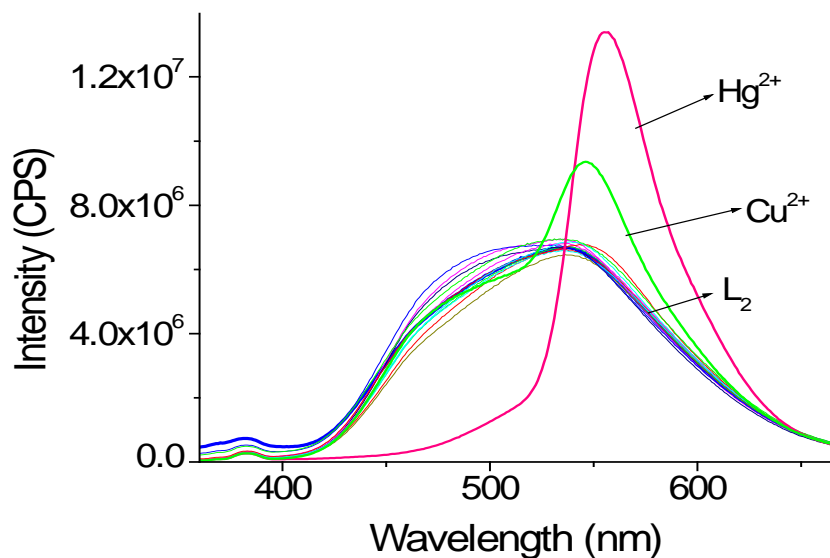

**SI Figure 14:** Changes in the emission spectra of **L<sub>2</sub>** (1.0 x 10<sup>-5</sup> M) in the presence of various other metal ions (Co<sup>2+</sup>, Ni<sup>2+</sup>, Cu<sup>2+</sup>, Ca<sup>2+</sup>, Cd<sup>2+</sup>, Co<sup>2+</sup>, Mg<sup>2+</sup>, Zn<sup>2+</sup>, Hg<sup>2+</sup>, Na<sup>+</sup>, K<sup>+</sup>, Fe<sup>2+</sup>) (4.0 x 10<sup>-4</sup> M) in water/acetonitrile (1:1, v/v) mixture.

## 16. Job's plot

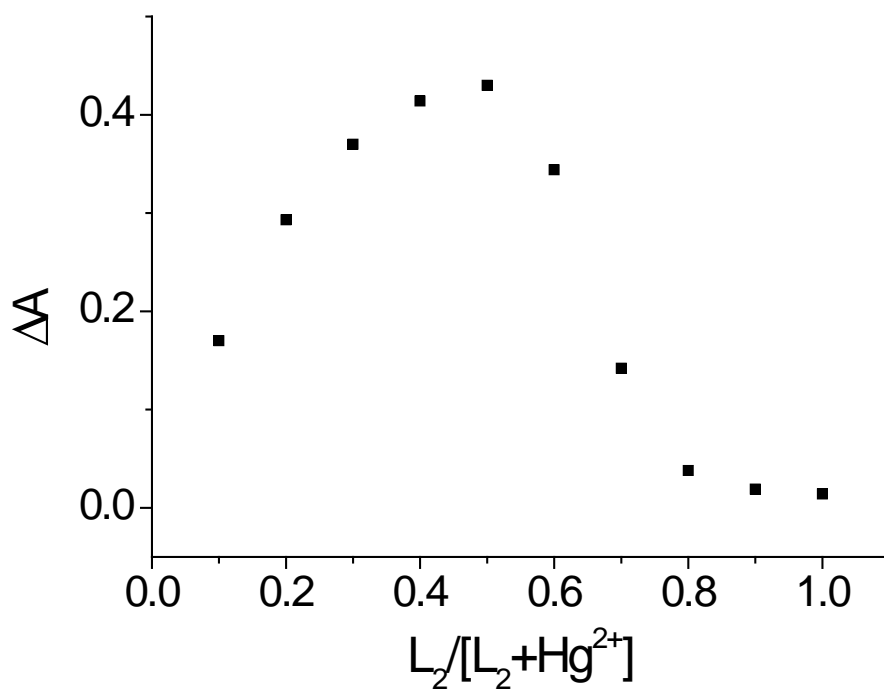

**SI Figure 15:** Job's plot of the complexation between  $L_2$  and  $Hg^{2+}$ . Total concentration of  $[L_2]+[Hg^{2+}] = 2.0 \times 10^{-4} M$

### 17. Reversible binding study with EDTA:

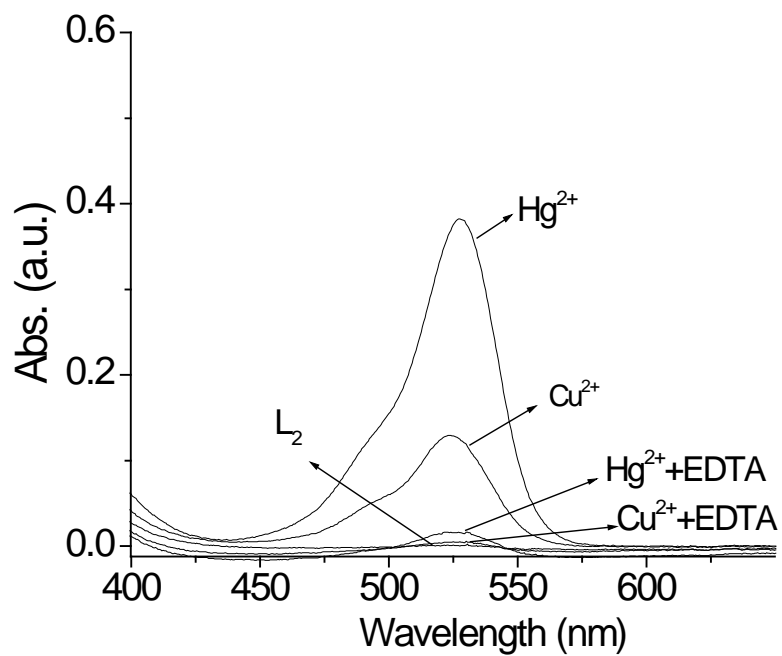

**SI Figure 16:** Uv-vis spectra of  $L_2$  ( $5.0 \times 10^{-5}$  M) in the presence of 10 mole equivalents of  $Hg^{2+}$  and  $Cu^{2+}$ . Excess of EDTA was added to  $L_2+M^{2+}$  in water/acetonitrile (1:1, v/v) mixture to show the reversible binding nature of  $Hg^{2+}/Cu^{2+}$  with  $L_2$

## 18. Absorption spectra of $L_1$ and $L_2$

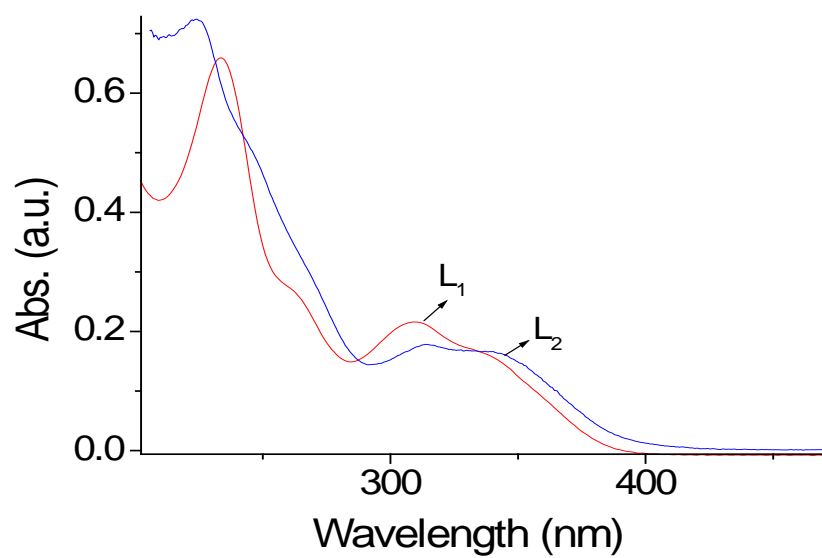

**SI Figure 17:** Absorption spectra of  $L_1$  and  $L_2$  ( $5.0 \times 10^{-5}M$ ) in water/acetonitrile (1:1, v/v) mixture.

**19. Visible and fluorescence color changes:**

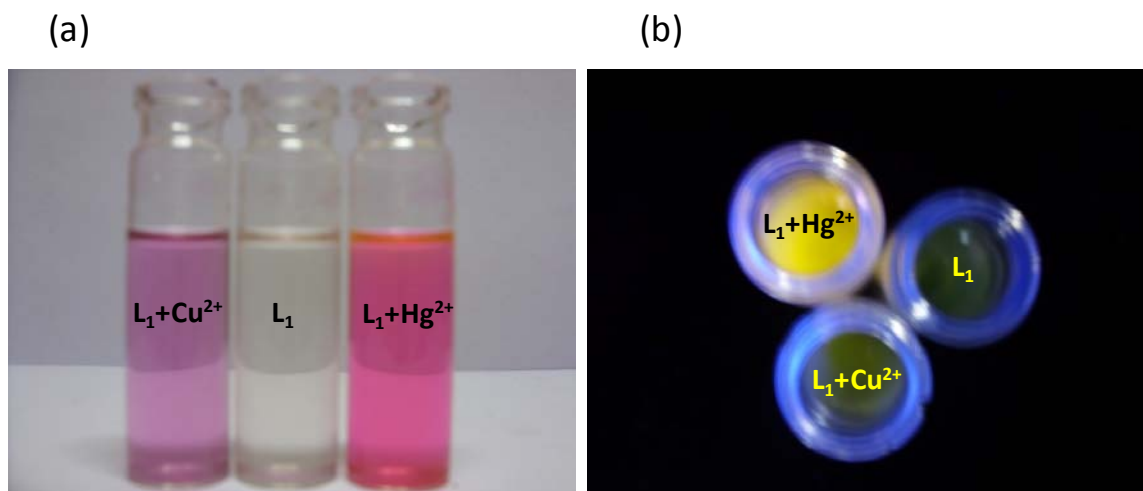

**SI Figure 18:** Visible (a) and fluorescence (b) color change of  $L_1$  ( $10 \times 10^{-6}$  M) in the presence of 10 mole equivalents of  $Hg^{2+}$  and  $Cu^{2+}$  in water/acetonitrile (1:1, v/v) mixture.

## **20. Bacterial cell growth:**

*Pseudomonas putida* was cultured in the King's B (KB) medium (Peptone 20g, glycerol 15g, K<sub>2</sub>HPO<sub>4</sub> 1.5 g, MgSO<sub>4</sub>·7H<sub>2</sub>O 1.5 g, distilled water 1000 ml, pH 7.2). The cells were harvested and vortexed for making the homogenous suspension in sterile distilled water. The cultured cells were first exposed to different concentration of Hg<sup>2+</sup> for 10 min at 25°C in 1:1 ethanol/water mixture. After 10 min, the unabsorbed Hg<sup>2+</sup> was removed through centrifugation in order to avoid the background fluorescence while recording fluorescence microscope images. The centrifuged bacterial cells were finally exposed to L<sub>2</sub> under the same condition and confocal images were recorded.

## **21. FRET calculation:**

The forster distance  $R_0$  can be calculated by

$$R_0 = 9.79 \times 10^3 [(J) Q (n^{-4}) (\kappa^2)]^{1/6}$$

Where  $n$  is the refractive index of the medium in between donor and acceptor and was taken approximately to be equal to 1.4.  $\kappa^2$  is the dipole orientation factor. Depending upon the relative orientation of donor and acceptor, the value ranges from 0 - 4 and it is often assumed to be 2/3.  $Q$  is the fluorescence quantum yield of the donor in the absence of acceptor.

$J$  is the spectral overlap integral between the emission spectrum of the donor and the absorption spectrum of the acceptor and was given by the following expression

$$J = \int f_D(\lambda) \varepsilon(\lambda) \lambda^4 d\lambda$$

$f_D(\lambda)$  is the normalised emission of the donor.  $\varepsilon(\lambda)$  is the molar absorption coefficient ( $M^{-1} \text{Cm}^{-1}$ ) of the donor.

## **22. Equations:**

Equation 1: Energy transfer efficiency ( $\Phi_{ET}$ ).

$$\Phi_{ET} = 1 - (F'_D / F_D) \quad \text{Eq. 1}$$

$F'_D$  and  $F_D$  denote the donor fluorescence intensity with and without an acceptor, respectively

Equation 2: Energy transfer rate constant ( $k_{ET}$ ).

$\tau_D$  denotes the fluorescence lifetime of the donor fragment in the absence of acceptor.
